# ANESTHESIOLOGY

Trusted Evidence: Discovery to Practice®

The Official Journal of the American Society of Anesthesiologists [anesthesiology.org](http://anesthesiology.org)

Mission: Promoting scientific discovery and knowledge in perioperative, critical care, and pain medicine to advance patient care.

## EDITOR-IN-CHIEF

**Evan D. Kharasch, M.D., Ph.D.**  
Editor-in-Chief, ANESTHESIOLOGY  
Department of Anesthesiology  
Duke University  
Durham, North Carolina  
Tel: 1-800-260-5631  
E-mail: [editorial-office@anesthesiology.org](mailto:editorial-office@anesthesiology.org)

## PAST EDITORS-IN-CHIEF

**Henry S. Ruth, M.D.**, 1940–1955  
**Ralph M. Tovell, M.D.**, 1956–1958  
**James E. Eckenhoff, M.D.**, 1959–1962  
**Leroy D. Vandam, M.D.**, 1963–1970  
**Arthur S. Keats, M.D.**, 1971–1973  
**Nicholas M. Greene, M.D.**, 1974–1976  
**C. Philip Larson, Jr., M.D.**, 1977–1979  
**John D. Michenfelder, M.D.**, 1980–1985  
**Lawrence J. Saidman, M.D.**, 1986–1996  
**Michael M. Todd, M.D.**, 1997–2006  
**James C. Eisenach, M.D.**, 2007–2016

## COVER ART

**James P. Rathmell, M.D.**, Boston, Massachusetts  
**Annemarie B. Johnson**,  
Medical Illustrator, Winston-Salem, North Carolina

For reprint inquiries and purchases, please contact  
[reprintsolutions@wolterskluwer.com](mailto:reprintsolutions@wolterskluwer.com) in North America, and  
[healthlicensing@wolterskluwer.com](mailto:healthlicensing@wolterskluwer.com) for rest of world.

Anesthesiology is abstracted or indexed in Index Medicus/MEDLINE, Science Citation Index/SciSearch, Current Contents/Clinical Medicine, Current Contents/Life Sciences, Reference Update, EMBASE/Excerpta Medica, Biological Abstracts (BIOSIS), Chemical Abstracts, Hospital Literature Index, and Comprehensive Index to Nursing and Allied Health Literature (CINAHL).

The affiliations, areas of expertise, and conflict-of-interest disclosure statements for each Editor and Associate Editor can be found on the Journal's Web site ([www.anesthesiology.org](http://www.anesthesiology.org)).

## CME EDITORS

**Leslie C. Jameson, M.D.**  
**Dan J. Kopacz, M.D.**

## EDITORIAL OFFICE

**Ryan Walther**, Managing Editor  
E-mail: [managing-editor@anesthesiology.org](mailto:managing-editor@anesthesiology.org)  
**Loretta Pickett**, Assistant Managing Editor  
**Gabrielle McDonald**, Digital Communications Specialist  
**Jennifer Workman**, Peer Review Supervisor  
**Caitlin Washburn**  
ANESTHESIOLOGY Journal  
1061 American Lane  
Schaumburg, IL 60173-4973  
Tel: 1-800-260-5631  
E-mail: [editorial-office@anesthesiology.org](mailto:editorial-office@anesthesiology.org)

## WOLTERS KLUWER HEALTH PUBLICATION STAFF

**Aaron Johnson**, Publisher  
**Cheryl Stringfellow**, Senior Journal Production Editor  
**Laura Mitchell**, Journal Production Editor  
**Lori Querry**, Journal Production Associate  
**Angie Clements**, National Account Manager

## ASA OFFICERS

**Randall Clark, M.D.**, President  
**Michael Champeau, M.D.**, President-Elect  
**Beverly K. Philip, M.D.**, Immediate Past President  
**Ronald L. Harter, M.D.**, First Vice-President

All articles accepted for publication are done so with the understanding that they are contributed exclusively to this Journal and become the property of the American Society of Anesthesiologists. Statements or opinions expressed in the Journal reflect the views of the author(s) and do not represent official policy of the American Society of Anesthesiologists unless so stated.

# ANESTHESIOLOGY

Trusted Evidence: Discovery to Practice<sup>®</sup>

The Official Journal of the American Society of Anesthesiologists [anesthesiology.org](http://anesthesiology.org)

Mission: Promoting scientific discovery and knowledge in perioperative, critical care, and pain medicine to advance patient care.

## EDITOR-IN-CHIEF

**Evan D. Kharasch**, M.D., Ph.D., Durham, North Carolina

## ASSISTANT EDITOR-IN-CHIEF

**Michael J. Avram**, Ph.D., Chicago, Illinois

## EXECUTIVE EDITORS

**Deborah J. Culley**, M.D., Philadelphia, Pennsylvania

**Andrew Davidson**, M.B.B.S., M.D., Victoria, Australia

**Jerrold H. Levy**, M.D., Durham, North Carolina

**Laszlo Vutskits**, M.D., Ph.D., Geneva, Switzerland

## EDITORS

**Brian T. Bateman**, M.D., Stanford, California

**Amanda A. Fox**, M.D., M.P.H., Dallas, Texas

**Yandong Jiang**, M.D., Ph.D., Houston, Texas

**Sachin Kheterpal**, M.D., M.B.A., Ann Arbor, Michigan

**Martin J. London**, M.D., San Francisco, California

**Kristin Schreiber**, M.D., Ph.D., Boston, Massachusetts

**Jamie W. Sleigh**, M.D., Hamilton, New Zealand

## STATISTICAL EDITOR

**Timothy T. Houle**, Ph.D., Boston, Massachusetts

## CREATIVE AND MULTIMEDIA EDITOR

**James P. Rathmell**, M.D., Boston, Massachusetts

## ASSOCIATE EDITORS

**Takashi Asai**, M.D., Ph.D., Osaka, Japan

**Beatrice Beck-Schimmer**, M.D., Zurich, Switzerland

**James M. Blum**, M.D., Atlanta, Georgia

**Sorin J. Brill**, M.D., Jacksonville, Florida

**Chad Michael Brummett**, M.D., Ann Arbor, Michigan

**John Butterworth**, M.D., Richmond, Virginia

**Maxime Cannesson**, M.D., Ph.D., Los Angeles, California

**Maurizio Cereda**, M.D., Boston, Massachusetts

**Vincent W. S. Chan**, M.D., Toronto, Canada

**Steven P. Cohen**, M.D., Baltimore, Maryland

**Melissa L. Coleman**, M.D., Hershey, Pennsylvania

**Albert Dahan**, M.D., Ph.D., Leiden, The Netherlands

**Sharon Einav**, M.Sc., M.D., Jerusalem, Israel

**Douglas Eleveld**, M.D., Groningen, The Netherlands

**Holger K. Eitzschig**, M.D., Ph.D., Houston, Texas

**Charles W. Emala, Sr.**, M.D., M.S., New York, New York

**David Faraoni**, M.D., Ph.D., Houston, Texas

**Ana Fernandez-Bustamante**, M.D., Ph.D., Aurora, Colorado

**Jorge A. Galvez**, M.D., M.B.I., Omaha, Nebraska

**Laurent Glance**, M.D., Rochester, New York

**Stephen T. Harvey**, M.D., Nashville, Tennessee

**Harriet W. Hopf**, M.D., Salt Lake City, Utah

**Vesna Jevtovic-Todorovic**, M.D., Ph.D., M.B.A., Aurora, Colorado

**Ru-Rong Ji**, Ph.D., Durham, North Carolina

**Cor J. Kalkman**, M.D., Utrecht, The Netherlands

**Karim Ladha**, M.D., M.Sc., Toronto, Canada

**Meghan Lane-Fall**, M.D., M.H.S.P., Philadelphia, Pennsylvania

**Adam B. Lerner**, M.D., Boston, Massachusetts

**Kate Leslie**, M.B.B.S., M.D., M.Epi., Melbourne, Australia

**Philipp Lirk**, M.D., Ph.D., Boston, Massachusetts

**George A. Mashour**, M.D., Ph.D., Ann Arbor, Michigan

**Michael Mazzeffi**, M.D., M.P.H., M.Sc., Charlottesville, Virginia

**Daniel Mclsaac**, M.D., M.P.H., Ottawa, Canada

**Jane S. Moon**, M.D., Los Angeles, California

**Jochen D. Muehlschlegel**, M.D., M.M.Sc., Boston, Massachusetts

**Paul S. Myles**, M.B., B.S., M.P.H., M.D., Melbourne, Australia

**Peter Nagele**, M.D., M.Sc., Chicago, Illinois

**Mark D. Neuman**, M.D., M.Sc., Philadelphia, Pennsylvania

**Craig Palmer**, M.D., Tucson, Arizona

**Alexander Proekt**, M.D., Ph.D., Philadelphia, Pennsylvania

**Cyril Rivat**, M.D., Montpellier, France

**Jeffrey Sall**, M.D., Ph.D., San Francisco, California

**Warren S. Sandberg**, M.D., Ph.D., Nashville, Tennessee

**Alan Jay Schwartz**, M.D., M.S.Ed., Philadelphia, Pennsylvania

**Daniel I. Sessler**, M.D., Cleveland, Ohio

**Allan F. Simpao**, M.D., M.B.I., Philadelphia, Pennsylvania

**Nikolaos J. Skubas**, M.D., Cleveland, Ohio

# ANESTHESIOLOGY

Trusted Evidence: Discovery to Practice®

The Official Journal of the American Society of Anesthesiologists [anesthesiology.org](http://anesthesiology.org)

Mission: Promoting scientific discovery and knowledge in perioperative, critical care, and pain medicine to advance patient care.

**Ken Solt**, M.D., Boston, Massachusetts

**David A. Story**, M.B.B.S., B.Med.Sci., M.D., Parkville, Australia

**Michel Struys**, M.D., Ph.D., Groningen, The Netherlands

**Eric Sun**, M.D., Ph.D., Palo Alto, California

**BobbieJean Sweitzer**, M.D., Fairfax, Virginia

**Marcos F. Vidal Melo**, M.D., Ph.D., New York, New York

**Suellen Walker**, Ph.D., London, United Kingdom

**Jonathan P. Wanderer**, M.D., M.Phil., Nashville, Tennessee

**Duminda N. Wijesundera**, M.D., Ph.D., Toronto, Canada

**Hannah Wunsch**, M.D., M.Sc., Toronto, Canada

**Michael Zaugg**, M.D., M.B.A., Edmonton, Canada

## VISUAL TEAM

**Christina Boncyk**, M.D., Nashville, Tennessee

**Jorge A. Galvez**, M.D., M.B.I., Omaha, Nebraska

**Meghan Lane-Fall**, M.D., M.S.H.P., Philadelphia, Pennsylvania

**Daniel Larach**, M.D., Nashville, Tennessee

**Nicholas W. Markin**, M.D., Omaha, Nebraska

**Olivia Nelson**, M.D., Philadelphia, Pennsylvania

**James P. Rathmell**, M.D., Boston, Massachusetts

**Allan F. Simpao**, M.D., M.B.I., Philadelphia, Pennsylvania

**Jonathan Tan**, M.D., M.P.H., M.B.I., Los Angeles, California

**Naveen Vanga**, M.D., Houston, Texas

**Annemarie B. Johnson**, Medical Illustrator, Winston-Salem, North Carolina

**Terri Navarette**, Graphic Artist, Schaumburg, Illinois

## AUDIO TEAM

**Jorge A. Galvez**, M.D., M.B.I., Omaha, Nebraska

**Young-Tae Jeon**, M.D., Seoul, Korea

**Yandong Jiang**, M.D., Ph.D., Houston, Texas

**Rie Kato**, M.D., D. Phil., Kanagawa, Japan

**James P. Rathmell**, M.D., Boston, Massachusetts

**Cyril Rivat**, M.D., Montpellier, France

**BobbieJean Sweitzer**, M.D., Fairfax, Virginia

**Henrique F. Vale**, M.D., Jackson, Mississippi

## SOCIAL MEDIA TEAM

**Rita Agarwal**, M.D., Palo Alto, California

**Sean Barnes**, M.B.A., M.D., Baltimore, Maryland

**Gregory Bryson**, M.D., B.Sc., M.Sc., Ottawa, Canada

**Nabil Elkassabany**, M.D., Philadelphia, Pennsylvania

**Alana Flexman**, M.D., Vancouver, Canada

**Jorge A. Galvez**, M.D., M.B.I., Omaha, Nebraska

**Harriet W. Hopf**, M.D., Salt Lake City, Utah

**Ruth Landau**, M.D., New York City, New York

**Edward R. Mariano**, M.D., M.A.S., Palo Alto, California

**Emily Sharpe**, M.D., Rochester, Minnesota

**Sasha Shillcutt**, M.D., M.S., Lincoln, Nebraska

**Caitlin Sutton**, M.D., Houston, Texas

**Allan F. Simpao**, M.D., M.B.I., Philadelphia, Pennsylvania

**Ankeet Udani**, M.D., M.S.Ed., Durham, North Carolina
